# Supplementary material
Source: publisher figshare collection journal article supplement (https://aacr.figshare.com/articles/dataset/_/22389692)

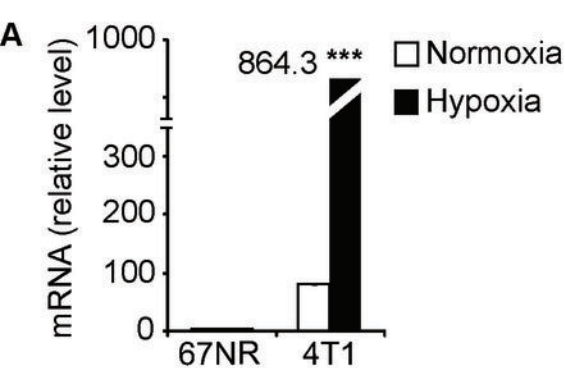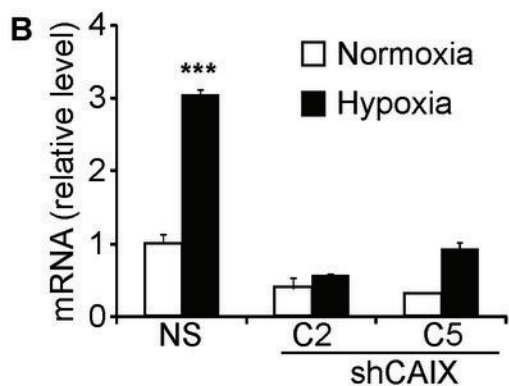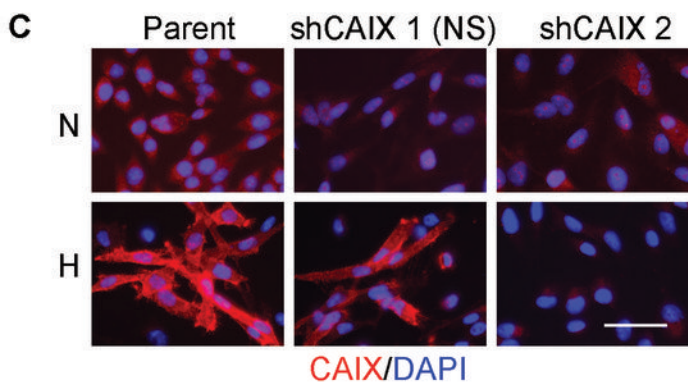

Supplementary Figure 1

Supplement: Supplementary file 1 [file 39835211]
